# Supplementary material for: Evaluation of Drug—Drug Interactions in EGFR-Mutated Non-Small-Cell Lung Cancer Patients during Treatment with Tyrosine-Kinase Inhibitors
Source: MDPI journal article supplement (doi:10.3390/jpm11050424), 2021-05-18

# Supplementary Material

## Tables

**Table S1** Studies that evaluated DDIs in lung cancer patients.

| Study                              | Treatment           | Total patients | Lung cancer patients | Kind of study |
|------------------------------------|---------------------|----------------|----------------------|---------------|
| Riechelmann RP et Al. <sup>8</sup> | iv CHT; mABs; OT    | 405            | 19 (5,0%)            | retrospective |
| Van Leeuwen et Al <sup>6</sup>     | iv CHT; mABs; OT    | 278            | 23 (8,3%)            | retrospective |
| Van Leeuwen et Al <sup>5</sup>     | os CHT; TKIs; OT    | 898            | 28 (3,1%)            | retrospective |
| Van Leeuwen et Al <sup>9</sup>     | CHT; mABs; TKIs; OT | 121            | 25 (8,3%) *          | prospective   |
| Lopez-Martin C et Al <sup>13</sup> | CHT                 | 75             | 17 (23%)             | prospective   |
| Rompelman FMV et Al <sup>14</sup>  | CHT                 | 298            | 260 (86%)            | prospective   |

**Abbreviations:** iv, intravenous; os, oral; CHT, chemotherapy; mABs, monoclonal antibodies; OT, hormone therapy; TKIs, tyrosine kinase inhibitors. \* Lung cancer patients considered in the group "others".

**Table S2** Identified DDIs involving EGFR tyrosine kinase inhibitors.

|                                                        |                                                                                                                                 |
|--------------------------------------------------------|---------------------------------------------------------------------------------------------------------------------------------|
| DDI total number                                       | 342                                                                                                                             |
| DDI requiring medical intervention                     | 20                                                                                                                              |
| DDI involving EGFR TKIs requiring medical intervention | 14                                                                                                                              |
| DDI requiring medical intervention                     |                                                                                                                                 |
| Yes                                                    | 14                                                                                                                              |
| No                                                     | 78                                                                                                                              |
| Major DDI involving the main oncological treatment     | Osimertinib<br>+ Escitalopram/Citalopram/Quetiapine/<br>Carbamazepine/Ivabradine/Fluoxetine<br><br>Gefitinib<br>+<br>Ranitidine |

Supplementary Material

Figures

Figure S1

a Kaplan-Meier describing PFS curve in all population.

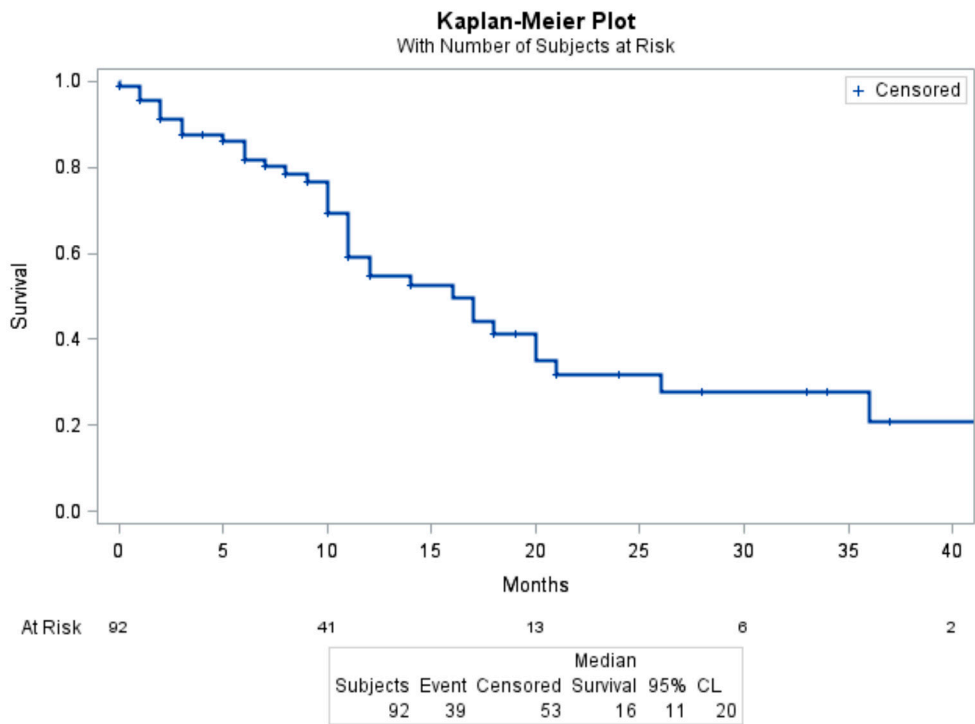

b Kaplan-Meier describing OS curve in all population.

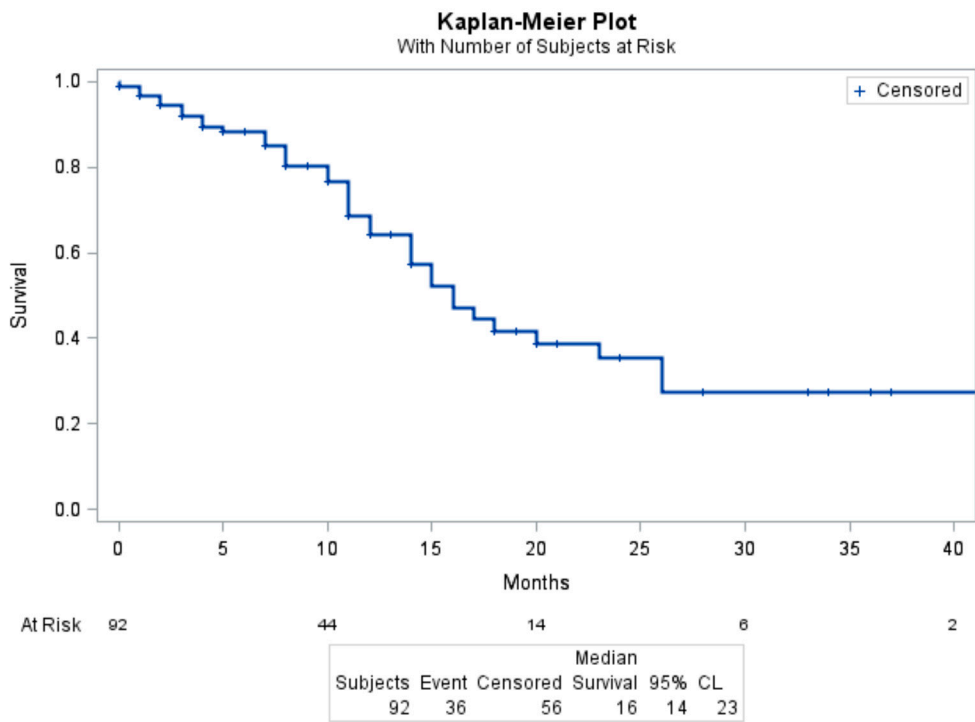

Supplement: s1 [file s1]
